# Supplementary material for: Effectiveness of mHealth/eHealth interventions on obesity treatment: a protocol for umbrella review of meta-analyses
Source: PubMed Central journal article supplement — BMJ Open. 2022 Jun 6;12(6):e052443. doi: 10.1136/bmjopen-2021-052443 (PMC9171196; doi:10.1136/bmjopen-2021-052443), 2022-06-06
Supplement: bmjopen-2021-052443.draft_revisions.pdf [file bmjopen-2021-052443.draft_revisions.pdf]

# BMJ Open

BMJ Open is committed to open peer review. As part of this commitment we make the peer review history of every article we publish publicly available.

When an article is published we post the peer reviewers' comments and the authors' responses online. We also post the versions of the paper that were used during peer review. These are the versions that the peer review comments apply to.

The versions of the paper that follow are the versions that were submitted during the peer review process. They are not the versions of record or the final published versions. They should not be cited or distributed as the published version of this manuscript.

BMJ Open is an open access journal and the full, final, typeset and author-corrected version of record of the manuscript is available on our site with no access controls, subscription charges or pay-per-view fees (<http://bmjopen.bmj.com>).

If you have any questions on BMJ Open's open peer review process please email [info.bmjopen@bmj.com](mailto:info.bmjopen@bmj.com)

# BMJ Open

## Effectiveness of mHealth/eHealth interventions on Obesity treatment: a protocol for umbrella review of meta-analyses

|                               |                                                                                                                                                                                                                                                                                                                                                                                                                                                                                                                                                                                                                                                                                                                                                                                                                    |
|-------------------------------|--------------------------------------------------------------------------------------------------------------------------------------------------------------------------------------------------------------------------------------------------------------------------------------------------------------------------------------------------------------------------------------------------------------------------------------------------------------------------------------------------------------------------------------------------------------------------------------------------------------------------------------------------------------------------------------------------------------------------------------------------------------------------------------------------------------------|
| Journal:                      | <i>BMJ Open</i>                                                                                                                                                                                                                                                                                                                                                                                                                                                                                                                                                                                                                                                                                                                                                                                                    |
| Manuscript ID                 | bmjopen-2021-052443                                                                                                                                                                                                                                                                                                                                                                                                                                                                                                                                                                                                                                                                                                                                                                                                |
| Article Type:                 | Protocol                                                                                                                                                                                                                                                                                                                                                                                                                                                                                                                                                                                                                                                                                                                                                                                                           |
| Date Submitted by the Author: | 15-Apr-2021                                                                                                                                                                                                                                                                                                                                                                                                                                                                                                                                                                                                                                                                                                                                                                                                        |
| Complete List of Authors:     | Lei, Xiang-Guo; Guangxi Medical University First Affiliated Hospital, Geriatrics Department of Endocrinology and Metabolism; Guangxi Medical University First Affiliated Hospital, Guangxi Clinical Research Center for Cardiocerebrovascular Diseases<br>Huang, Zhongheng; Guangxi Medical University Rashi, Tamrakar; Guangxi Medical University First Affiliated Hospital, Geriatrics Department of Endocrinology and Metabolism; Guangxi Medical University First Affiliated Hospital, Guangxi Clinical Research Center for Cardiocerebrovascular Diseases<br>Yang, Xi; Guangxi Medical University First Affiliated Hospital, Geriatrics Department of Endocrinology and Metabolism; Guangxi Medical University First Affiliated Hospital, Guangxi Clinical Research Center for Cardiocerebrovascular Diseases |
| Keywords:                     | Telemedicine < BIOTECHNOLOGY & BIOINFORMATICS, World Wide Web technology < BIOTECHNOLOGY & BIOINFORMATICS, INTERNAL MEDICINE                                                                                                                                                                                                                                                                                                                                                                                                                                                                                                                                                                                                                                                                                       |
|                               |                                                                                                                                                                                                                                                                                                                                                                                                                                                                                                                                                                                                                                                                                                                                                                                                                    |

SCHOLARONE™  
Manuscripts

Effectiveness of mHealth/eHealth interventions on Obesity treatment: a protocol for umbrella review of meta-analyses

Xiang-Guo Lei<sup>123</sup>, Zhongheng Huang<sup>4</sup>, Tamrakar Rashi<sup>123</sup>, Xi Yang<sup>123</sup>

<sup>1</sup>Geriatrics Department of Endocrinology and Metabolism, The First Affiliated Hospital of Guangxi Medical University, Nanning, Guangxi, China.

<sup>2</sup>Guangxi Clinical Research Center for Cardiocerebrovascular Diseases, The First Affiliated Hospital of Guangxi Medical University, Nanning, Guangxi, China

<sup>3</sup>Guangxi Key Laboratory of Precision Medicine in Cardio cerebrovascular Diseases Control and Prevention, The First Affiliated Hospital of Guangxi Medical University, Nanning, Guangxi, China

<sup>4</sup>Guangxi Medical University

Correspondence to

Xi Yang;

[yangxicc2008@sina.cn](mailto:yangxicc2008@sina.cn)

## ABSTRACT

### Introduction

mHealth/eHealth have the effect to facilitate weight loss in overweight and obese populations. However, studies showed varied results and relatively high heterogeneity in the efficacy of mHealth/eHealth interventions. The aim of the paper is to systematically summarize published studies about the weight loss efficacy of mHealth/eHealth.

### Methods and analysis

A comprehensive review of PubMed, Embase and Cochrane Library databases published from inception until March 21, 2021 will be conducted. The selected articles are meta-analyses that integrated the studies, which evaluated efficacy of mHealth/eHealth. Two people will select eligible articles and extract data independently. Any disputes will be resolved by discussion or the arbitration of a third person. The methodological quality of the included meta-analyses will be assessed with AMSTAR 2 and the quality of evidence with GRADE. Study selection process will be presented using a flowchart. We will re-analyze each outcome with the random effect methods. If possible, we will use funnel plot and Egger's test to evaluate if the publication bias existed.

### Ethics and dissemination

Ethical approval is not required for the study, as we only collected data from available published materials. This umbrella review will also be submitted to a peer-reviewed journal for publication after completion.

**PROSPERO registration number** It has been submitted but has not yet been accepted

### Strengths and limitations of this study

- ▶ When sufficient data are available, we will do subgroup analysis according to the forms of the intervention, such as mobile app group, text message group, website group.
- ▶ We will reanalyze each outcome using the random effects model.
- ▶ The methodological quality of the included meta-analyses will be assessed with AMSTAR 2 and the quality of evidence with GRADE.

## Introduction

### Description of the condition

Obesity is a chronic illness characterized by inordinate accumulation of body fat<sup>1</sup>. In 2005, 23.2% (937 million) of the global adult population was diagnosed as having overweight and 9.8% (396 million) as having obesity; the respective numbers of adults with overweight and obesity are projected to be 1.35 billion and 573 million individuals in 2030, without adjusting for secular trends<sup>2</sup>. Obesity is responsible for about 5 percent of all deaths a year worldwide, and its global economic impact amounts to roughly \$2 trillion annually, or 2.8 percent of global GDP<sup>3</sup>. Research suggests that by delivering interventions via mHealth or eHealth, some of the cost problems of obesity interventions are mitigated<sup>4-6</sup> and these two modalities have the effect to facilitate weight loss in overweight and obese populations<sup>6-7</sup>.

### Description of the intervention

mHealth/eHealth refers to the health services delivered or enhanced through mobile/electronic-related technology<sup>8-9</sup>. There's a lot of overlap between them, mHealth help patients improve their adherence to health care providers' advice, enhance patient-provider communication, specifically mobile apps<sup>10-11</sup> and eHealth interventions combine the use of emerging communication technologies, such as the Internet and Smartphones, to facilitate behavior changes and improvements in health<sup>12</sup>. One previous reviews has described the development of mHealth and its utility for patients with obesity<sup>13</sup>. Nonetheless, their scope did not adequately address the effectiveness of eHealth for obesity treatment and without analyzing the findings from the original studies. An umbrella review evaluating the effectiveness of mHealth/eHealth interventions is required to weigh the strength and validity of mHealth/eHealth interventions in the literature.

### Aim

This study aimed to conduct an umbrella review of meta-analyses regarding the associations between mHealth/eHealth interventions and Obesity treatment, and reanalyze its strength and validity.

## Methods

### Stage 1: identifying relevant studies

At this stage, authors will establish a team and discuss the eligibility criteria, electronic databases and search strategy.

### Eligibility criteria

Meta-analyses of observational studies or meta-analyses of randomized controlled trials  
Original studies and studies with no summary relative risks (e.g. systematic reviews), studies reported in languages other than English will be excluded.

### Databases

The identification of studies relevant to this overview will be gained by searching the published reviews from inception of databases until March 21, 2021 which are listed below: PubMed, Embase and Cochrane Library. We will also manually search all reference lists of the included studies to identify additional reviews of relevance.

**Search strategy**

We will use the search strategy with these specified keywords: (Overweight OR Obesity OR weight gain OR weight loss OR body mass index OR skinfold thickness OR waist-hip ratio OR Abdominal Fat) AND (mhealth OR ehealth OR telemedicine) AND (Metaanalysis OR Meta OR meta-analys\*). We will modify the search strategy to suit all three databases.

**Stage 2: study selection**

We will import our search results into software and then start selection. The review process consists of two levels of screening: (1) a title and abstract review and (2) a full-text review. In the first phase of screening, the titles and abstracts of the retrieved articles will be browsed through and analyzed by two independent investigators to identify potential eligibility. In the second phase, the two investigators will then independently evaluate the full-text articles to decide whether each should be included/excluded. Any discrepancies in the two phases will be reconsidered, and unresolved disagreements will be further discussed with a third investigator, until a full consensus is reached.

**Stage 3: data extraction**

Data extraction tables will be established in Excel and the data from selected articles will be extracted independently by two people. Disputes will be resolved by discussion or the arbitration of a third person if necessary.

The following categories of data will be extracted: the first author, year of publication, number of trials included, sample size, Intervention, Control, quality assessment, main conclusion.

**Population**

overweight and obese populations

**Intervention**

mHealth/eHealth

**Comparators**

Use other methods other than mHealth/eHealth or orthobiosis

**Type of studies**

meta analyses

**Outcomes****Primary outcomes**

Weight loss, BMI change, waist change

**Secondary outcomes**

None

**Stage 4: data synthesis and statistical analysis**

1  
2  
3 Statistical analysis will be conducted with RevMan V.5.4 software provided by Cochrane  
4 Collaboration and Stata V.12.0 software. In our analysis, when possible, we will stratify the  
5 comparisons into several groups, such as group of use other methods other than mHealth/eHealth  
6 and orthobiosis group. We will do subgroup analysis according to the forms of intervention, such  
7 as mobile app group, text message group, website group.

8  
9 A qualitative and quantitative analysis will be provided. The quantitative analysis will be  
10 performed through calculation of weighted mean differences for continuous outcomes and risk  
11 ratio for the dichotomous.

12  
13 Heterogeneity will be evaluated using the  $I^2$  statistic. We will use 25%, 50% and 75% as cut-offs  
14 for low, moderate and high heterogeneity, respectively.

#### 15 16 17 **Stage 5: identifying possible publication bias**

18 Small study effects and publication bias will be assessed by using graphical and statistical tests,  
19 namely the funnel plot and Egger's test. A p-value of  $<0.10$  indicates the presence of publication  
20 bias.

#### 21 22 23 **Stage 6: evaluating quality of included studies**

24 We will assess both the methodological quality and the quality of evidence of each including  
25 meta-analysis using validated tools. The methodological quality of the included meta-analyses will  
26 be assessed with AMSTAR 2 and the quality of evidence with GRADE.

#### 27 28 29 **Patient and public involvement**

30 No patients are involved in developing plans for project and implementation of this study. None of  
31 them are asked to advise on interpretation of results. The results will be disseminated to the  
32 general population through public presentations by the authors.

#### 33 34 35 **Discussion**

36 In the meta-analyses that focused on outcomes of mHealth/eHealth interventions, some of the  
37 results are widely divergent. When sufficient data are available, we will stratify our comparisons  
38 and do subgroup analysis.

39 The limitations of our study are the heterogeneity and quality of the selected reviews. To address  
40 the limitations, we will reanalyze each outcome using the random effects model. We will also use  
41 AMSTAR 2 and GRADE to evaluate quality of studies that we will include. Furthermore, these  
42 factors will be carefully considered when interpreting the results.

#### 43 44 45 **Ethics and dissemination**

46 Ethical approval is not required for the study, as we only collected data from available materials.  
47 This umbrella review will also be submitted to a peer-reviewed journal for publication.

48  
49  
50 **Contributors** XY carried on the conception and construction of this protocol. X-GL developed  
51 the search strategy. X-GL and ZH compared and found the best tools for assessing possible bias  
52 and evaluating quality of included reviews. X-GL wrote the protocol. TR reviewed and amended  
53 the draft of the protocol. X-GL and TR added grammar editing and conceptual clarification. All  
54 authors read and approved the final manuscript.

**Funding** The Excellent Medical Elite Training Program of The First Affiliated Hospital of Guangxi Medical University [Grant numbers 2017025]; Medical and Health Appropriate Technology Development, Promotion and Application Project of Guangxi [Grant numbers 2016018]

**Competing interests** None declared.

**Patient consent for publication** Not required.

**Provenance and peer review** Not commissioned; externally peer reviewed.

**Open access** This is an open access article distributed in accordance with the Creative Commons Attribution Non Commercial (CC BY-NC 4.0) license, which permits others to distribute, remix, adapt, build upon this work non-commercially, and license their derivative works on different terms, provided the original work is properly cited, appropriate credit is given, any changes made indicated, and the use is non-commercial.

See: <http://creativecommons.org/licenses/by-nc/4.0/>.

#### ORCID iD

Xiang-Guo Lei <https://orcid.org/0000-0002-0094-7910>

## References

1. D. W. Haslam, W. P. James. Obesity. *LANCET* 2005;366(9492):1197-209. doi: 10.1016/S0140-6736(05)67483-1 pmid:161987692005-10-01].
2. T. Kelly, W. Yang, C. S. Chen, K. Reynolds, J. He. Global burden of obesity in 2005 and projections to 2030. *Int J Obes (Lond)* 2008;32(9):1431-37. doi: 10.1038/ijo.2008.102 pmid:186073832008-09-01].
3. Dobbs R, Sawers C, Thompson F, et al. How the world could better fight obesity. November 1, 2014. Accessed April 11, 2021. <https://www.mckinsey.com/industries/healthcare-systems-and-services/our-insights/how-the-world-could-better-fight-obesity>.
4. S. R. Steinhubl, E. D. Muse, E. J. Topol. Can mobile health technologies transform health care? *JAMA* 2013;310(22):2395-96. doi: 10.1001/jama.2013.281078 pmid:241584282013-12-11].
5. G. Eysenbach. The law of attrition. *J MED INTERNET RES* 2005;7(1):e11. doi: 10.2196/jmir.7.1.e11 pmid:158294732005-03-31].
6. M. J. Hutchesson, M. E. Rollo, R. Krukowski, et al. eHealth interventions for the prevention and treatment of overweight and obesity in adults: a systematic review with meta-analysis. *OBES REV* 2015;16(5):376-92. doi: 10.1111/obr.12268 pmid:25753009.[(c) 2015 World Obesity.:\*2015-05-01].
7. B. Khokhar, J. Jones, P. E. Ronksley, et al. Effectiveness of mobile electronic devices in weight loss among overweight and obese populations: a systematic review and meta-analysis. *BMC Obes* 2014;1:22. doi: 10.1186/s40608-014-0022-4 pmid:262175092014-01-20].
8. World Health Organization. mHealth: new horizons for health through mobile technologies: second global survey on eHealth (Global Observatory for eHealth Series, Volume 3). 2011. Accessed April 11, 2021. [https://apps.who.int/iris/bitstream/handle/10665/44607/9789241564250\\_eng.pdf?sequence=1&isAllowed=y](https://apps.who.int/iris/bitstream/handle/10665/44607/9789241564250_eng.pdf?sequence=1&isAllowed=y).

- 1
- 2
- 3
- 4 9. G. Eysenbach. What is e-health? *J MED INTERNET RES* 2001;3(2):E20. doi:  
5 10.2196/jmir.3.2.e20 pmid:117209622001-04-01].
- 6 10. S. Goyal, J. A. Cafazzo. Mobile phone health apps for diabetes management: current evidence and  
7 future developments. *QJM* 2013;106(12):1067-69. doi: 10.1093/qjmed/hct203  
8 pmid:241063132013-12-01].
- 9 11. Gemma Flores Mateo, Esther Granado-Font, Carme Ferré-Grau, Xavier Montaña-Carreras.  
10 Mobile Phone Apps to Promote Weight Loss and Increase Physical Activity: A Systematic  
11 Review and Meta-Analysis. *J MED INTERNET RES* 2015;17(11):e253. doi:  
12 10.2196/jmir.4836.[JMIR Publications Inc:\*2015-01-01].
- 13 12. J. E. Orlikoff, M. K. Totten. Trustee workbook 3. E-health and the board: the brave new world of  
14 governance, Part 1. In. Trustee workbook 3. United States, 2000:4-14.
- 15 13. Youfa Wang, Jungwon Min, Jacob Khuri, et al. Effectiveness of Mobile Health Interventions on  
16 Diabetes and Obesity Treatment and Management: Systematic Review of Systematic Reviews.  
17 *JMIR MHEALTH UHEALTH* 2020;8(4):e15400. doi: 10.2196/15400.[JMIR  
18 Publications:\*2020-01-01].
- 19
- 20
- 21
- 22
- 23
- 24
- 25
- 26
- 27
- 28
- 29
- 30
- 31
- 32
- 33
- 34
- 35
- 36
- 37
- 38
- 39
- 40
- 41
- 42
- 43
- 44
- 45
- 46
- 47
- 48
- 49
- 50
- 51
- 52
- 53
- 54
- 55
- 56
- 57
- 58
- 59
- 60

### 校对报告

当前使用的样式是 [BMJ-British Medical Journal]

当前文档包含的题录共 14 条

有 0 条题录存在必填字段内容缺失的问题

所有题录的数据正常

# BMJ Open

## Effectiveness of mHealth/eHealth interventions on Obesity treatment: a protocol for umbrella review of meta-analyses

|                                 |                                                                                                                                                                                                                                                                                                                                                                                                                                                                                                                                                                                                                                                                                                                                                                                                                    |
|---------------------------------|--------------------------------------------------------------------------------------------------------------------------------------------------------------------------------------------------------------------------------------------------------------------------------------------------------------------------------------------------------------------------------------------------------------------------------------------------------------------------------------------------------------------------------------------------------------------------------------------------------------------------------------------------------------------------------------------------------------------------------------------------------------------------------------------------------------------|
| Journal:                        | <i>BMJ Open</i>                                                                                                                                                                                                                                                                                                                                                                                                                                                                                                                                                                                                                                                                                                                                                                                                    |
| Manuscript ID                   | bmjopen-2021-052443.R1                                                                                                                                                                                                                                                                                                                                                                                                                                                                                                                                                                                                                                                                                                                                                                                             |
| Article Type:                   | Protocol                                                                                                                                                                                                                                                                                                                                                                                                                                                                                                                                                                                                                                                                                                                                                                                                           |
| Date Submitted by the Author:   | 06-Dec-2021                                                                                                                                                                                                                                                                                                                                                                                                                                                                                                                                                                                                                                                                                                                                                                                                        |
| Complete List of Authors:       | Lei, Xiang-Guo; Guangxi Medical University First Affiliated Hospital, Geriatrics Department of Endocrinology and Metabolism; Guangxi Medical University First Affiliated Hospital, Guangxi Clinical Research Center for Cardiocerebrovascular Diseases<br>Huang, Zhongheng; Guangxi Medical University Rashi, Tamrakar; Guangxi Medical University First Affiliated Hospital, Geriatrics Department of Endocrinology and Metabolism; Guangxi Medical University First Affiliated Hospital, Guangxi Clinical Research Center for Cardiocerebrovascular Diseases<br>Yang, Xi; Guangxi Medical University First Affiliated Hospital, Geriatrics Department of Endocrinology and Metabolism; Guangxi Medical University First Affiliated Hospital, Guangxi Clinical Research Center for Cardiocerebrovascular Diseases |
| <b>Primary Subject Heading</b>: | Evidence based practice                                                                                                                                                                                                                                                                                                                                                                                                                                                                                                                                                                                                                                                                                                                                                                                            |
| Secondary Subject Heading:      | Evidence based practice                                                                                                                                                                                                                                                                                                                                                                                                                                                                                                                                                                                                                                                                                                                                                                                            |
| Keywords:                       | Telemedicine < BIOTECHNOLOGY & BIOINFORMATICS, World Wide Web technology < BIOTECHNOLOGY & BIOINFORMATICS, INTERNAL MEDICINE                                                                                                                                                                                                                                                                                                                                                                                                                                                                                                                                                                                                                                                                                       |
|                                 |                                                                                                                                                                                                                                                                                                                                                                                                                                                                                                                                                                                                                                                                                                                                                                                                                    |

SCHOLARONE™  
Manuscripts

Effectiveness of mHealth/eHealth interventions on Obesity treatment: a protocol for umbrella review of meta-analyses

Xiang-Guo Lei<sup>123</sup>, Zhongheng Huang<sup>4</sup>, Tamrakar Rashi<sup>123</sup>, Xi Yang<sup>123</sup>

<sup>1</sup>Geriatrics Department of Endocrinology and Metabolism, The First Affiliated Hospital of Guangxi Medical University, Nanning, Guangxi, China.

<sup>2</sup>Guangxi Clinical Research Center for Cardiocerebrovascular Diseases, The First Affiliated Hospital of Guangxi Medical University, Nanning, Guangxi, China

<sup>3</sup>Guangxi Key Laboratory of Precision Medicine in Cardio cerebrovascular Diseases Control and Prevention, The First Affiliated Hospital of Guangxi Medical University, Nanning, Guangxi, China

<sup>4</sup>Guangxi Medical University

Correspondence to

Xi Yang;

yangxicc2008@sina.cn

## ABSTRACT

### Introduction

mHealth/eHealth have the effect to facilitate weight loss in overweight and obese populations. However, studies showed varied results and relatively high heterogeneity in the efficacy of mHealth/eHealth interventions. The aim of the paper is to systematically summarize published studies about the weight loss efficacy of mHealth/eHealth.

### Methods and analysis

A comprehensive review of PubMed, Embase and Cochrane Library databases published from inception until March 21, 2021 will be conducted. The selected articles are meta-analyses that integrated the studies, which evaluated efficacy of mHealth/eHealth. Two people will select eligible articles and extract data independently. Any disputes will be resolved by discussion or the arbitration of a third person. The methodological quality of the included meta-analyses will be assessed with AMSTAR 2 and the quality of evidence with GRADE. Study selection process will be presented using a flowchart. We will re-analyze each outcome with the random effect methods. If possible, we will use funnel plot and Egger's test to evaluate if the publication bias existed.

### Ethics and dissemination

Ethical approval is not required for the study, as we only collected data from available published materials. This umbrella review will also be submitted to a peer-reviewed journal for publication after completion.

**PROSPERO registration number** CRD42021247006

### Strengths and limitations of this study

- ▶ When sufficient data are available, we will do subgroup analysis according to the forms of the intervention, such as mobile app group, text message group, website group.
- ▶ We will reanalyze each outcome using the random effects model.
- ▶ The methodological quality of the included meta-analyses will be assessed with AMSTAR 2 and the quality of evidence with GRADE.

## Introduction

### Description of the condition

Obesity is a chronic illness characterized by inordinate accumulation of body fat<sup>1</sup>. In 2005, 23.2% (937 million) of the global adult population was diagnosed as having overweight and 9.8% (396 million) as having obesity; the respective numbers of adults with overweight and obesity are projected to be 1.35 billion and 573 million individuals in 2030, without adjusting for secular trends<sup>2</sup>. Obesity is responsible for about 5 percent of all deaths a year worldwide, and its global economic impact amounts to roughly \$2 trillion annually, or 2.8 percent of global GDP<sup>3</sup>. Research suggests that by delivering interventions via mHealth or eHealth, some of the cost problems of obesity interventions are mitigated<sup>4-6</sup> these two modalities have the potential to effectively facilitate weight loss in overweight and obese populations<sup>6-7</sup>.

### Description of the intervention

The WHO proposes eHealth as a facilitator of health, and mHealth is a component of eHealth. mHealth/eHealth generally refers to the health services delivered or enhanced through mobile/electronic-related technology<sup>8-9</sup>. There's a lot of overlap between them, mHealth help patients improve their adherence to health care providers' advice, enhance patient-provider communication, specifically mobile apps<sup>10-11</sup> and eHealth interventions combine the use of emerging communication technologies, such as the Internet and Smartphones, to facilitate behavior changes and improvements in health<sup>12</sup>. To date, mHealth/eHealth have no standard definition. In this study, we defined mHealth/eHealth as health practice or services supported by mobile phone, tablet and computer. One previous review of reviews has described the development of mHealth and its utility for patients with obesity<sup>13</sup>. Nonetheless, their scope did not adequately address the effectiveness of eHealth for obesity treatment and without analyzing the findings from the original studies. At present, there are many meta-analyses about mHealth/eHealth<sup>14-17</sup> and we are looking specifically at weight reduction between behavior change. Therefore this umbrella review evaluated the effectiveness of mHealth/eHealth interventions and weighed the strength and validity of mHealth/eHealth interventions in the literature.

### Aim

This study aims to conduct an umbrella review of meta-analyses regarding the associations between mHealth/eHealth interventions and Obesity treatment, and reanalyze its strength and validity.

### Methods

#### Stage 1: identifying relevant studies

At this stage, authors will establish a team and discuss the eligibility criteria, electronic databases and search strategy.

#### Eligibility criteria

Meta-analyses of observational studies or meta-analyses of randomized controlled trials and follow-up duration at least 4 weeks.

Original studies and studies with no summary relative risks (e.g. systematic reviews), studies reported in languages other than English will be excluded.

## Databases

The identification of studies relevant to this overview will be gained by searching the published reviews from inception of databases until March 21, 2021 which are listed below: PubMed, Embase and Cochrane Library. We will also manually search all reference lists of the included studies to identify additional reviews of relevance.

## Search strategy

We will use the search strategy with these specified keywords: (Overweight OR Obesity OR weight gain OR weight loss OR body mass index OR skinfold thickness OR waist-hip ratio OR Abdominal Fat) AND (mhealth OR ehealth OR telemedicine) AND (Metaanalysis OR Meta OR meta-analys\*). We will modify the search strategy to suit all three databases.

## Stage 2: study selection

We will import our search results into software and then start selection. The review process consists of two levels of screening: (1) a title and abstract review and (2) a full-text review. In the first phase of screening, the titles and abstracts of the retrieved articles will be browsed through and analyzed by two independent investigators to identify potential eligibility. In the second phase, the two investigators will then independently evaluate the full-text articles to decide whether each should be included/excluded. Any discrepancies in the two phases will be reconsidered, and unresolved disagreements will be further discussed with a third investigator, until a full consensus is reached.

## Stage 3: data extraction

Data extraction tables will be established in Excel and the data from selected articles will be extracted independently by two people. Disputes will be resolved by discussion or the arbitration of a third person if necessary.

The following categories of data will be extracted: the first author, year of publication, number of trials included, sample size, Intervention, Control, quality assessment, main conclusion.

## Population

Adult population with overweight or obesity

We will define overweight as a body mass index (BMI) : 25 kg/m-squared and < 30 kg/m-squared (AAFP2013; WHO 2004). Obesity will be defined by a BMI : 30 kg/m-squared (AAFP 2013; WHO 2004)

## Intervention

mHealth/eHealth as health practice or services supported by mobile phone, tablet or computer

## Comparators

Use other methods other than mHealth/eHealth or orthobiosis

## Type of studies

meta analyses

## Outcomes

### Primary outcomes

Weight loss and Weight loss subgroup analysis (mobile phone base weight loss group, computer base weight loss group, tablet base weight loss group, mobile phone + computer base weight loss group, mobile phone + tablet base weight loss group, computer + tablet base weight loss group)

### Secondary outcomes

BMI change, Waist change

### Stage 4: data synthesis and statistical analysis

Statistical analysis will be conducted with RevMan V.5.4 software provided by Cochrane Collaboration and Stata software (version 12; StataCorp LP, College Station, Texas). In our analysis, when possible, we will stratify the comparisons into several groups, such as group of use other methods other than mHealth/eHealth and orthobiosis group. We will do subgroup analysis according to the forms of intervention, such as mobile app group, text message group, website group.

A qualitative and quantitative analysis will be provided. The quantitative analysis will be performed through calculation of weighted mean differences for continuous outcomes and risk ratio for the dichotomous.

Heterogeneity will be evaluated using the  $I^2$  statistic. We will use 25%, 50% and 75% as cut-offs for low, moderate and high heterogeneity, respectively.

### Stage 5: identifying possible publication bias

Small study effects and publication bias will be assessed by using graphical and statistical tests, namely the funnel plot and Egger's test. A p-value of <0.10 indicates the presence of publication bias.

### Stage 6: evaluating quality of included studies

We will assess both the methodological quality and the quality of evidence of each including meta-analysis using validated tools. The methodological quality of the included meta-analyses will be assessed with AMSTAR 2 and the quality of evidence with GRADE.

### Patient and public involvement

No patients are involved in developing plans for project and implementation of this study. None of them are asked to advise on interpretation of results. The results will be disseminated to the general population through public presentations by the authors.

### Discussion

In the meta-analyses that focused on outcomes of mHealth/eHealth interventions, some of the results are widely divergent. When sufficient data are available, we will stratify our comparisons and do subgroup analysis.

The limitations of our study are the heterogeneity and quality of the selected reviews. To address

1  
2  
3 the limitations, we will reanalyze each outcome using the random effects model. We will also use  
4 AMSTAR 2 and GRADE to evaluate quality of studies that we will include. These factors will be  
5 carefully considered when interpreting the results. Furthermore, we will discuss  
6 non-mHealth/eHealth interventions on Obesity treatment, including drug intervention and  
7 surgical intervention.  
8  
9

### 10 **Ethics and dissemination**

11 Ethical approval is not required for the study, as we only collected data from available materials.  
12 This umbrella review will also be submitted to a peer-reviewed journal for publication.  
13  
14  
15

16 **Contributors** XY carried on the conception and construction of this protocol. X-GL developed the  
17 search strategy. X-GL and ZH compared and found the best tools for assessing possible bias and  
18 evaluating quality of included reviews. X-GL wrote the protocol. TR reviewed and amended the  
19 draft of the protocol. X-GL and TR added grammar editing and conceptual clarification. All  
20 authors read and approved the final manuscript.  
21  
22

23 **Funding** The Excellent Medical Elite Training Program of The First Affiliated Hospital of Guangxi  
24 Medical University [Grant numbers 2017025]; Medical and Health Appropriate Technology  
25 Development, Promotion and Application Project of Guangxi [Grant numbers 2016018]  
26

27 **Competing interests** None declared.

28 **Patient consent for publication** Not required.

29 **Provenance and peer review** Not commissioned; externally peer reviewed.

30 **Open access** This is an open access article distributed in accordance with the Creative Commons  
31 Attribution Non Commercial (CC BY-NC 4.0) license, which permits others to distribute, remix,  
32 adapt, build upon this work non-commercially, and license their derivative works on different  
33 terms, provided the original work is properly cited, appropriate credit is given, any changes made  
34 indicated, and the use is non-commercial.  
35

36 See: <http://creativecommons.org/licenses/by-nc/4.0/>.  
37  
38  
39

### 40 **ORCID iD**

41 Xiang-Guo Lei <https://orcid.org/0000-0002-0094-7910>  
42  
43  
44

## 45 **References**

- 46 1. D. W. Haslam, W. P. James. Obesity. *LANCET* 2005;366(9492):1197-209. doi:  
47 10.1016/S0140-6736(05)67483-1 pmid:161987692005-10-01].
- 48 2. T. Kelly, W. Yang, C. S. Chen, K. Reynolds, J. He. Global burden of obesity in 2005 and  
49 projections to 2030. *Int J Obes (Lond)* 2008;32(9):1431-37. doi: 10.1038/ijo.2008.102  
50 pmid:186073832008-09-01].
- 51 3. Dobbs R, Sawers C, Thompson F, et al. How the world could better fight obesity. November 1,  
52 2014. Accessed April 11, 2021.  
53 <https://www.mckinsey.com/industries/healthcare-systems-and-services/our-insights/how-the-world-could-better-fight-obesity>.
- 54 4. S. R. Steinhubl, E. D. Muse, E. J. Topol. Can mobile health technologies transform health care?  
55  
56  
57  
58  
59  
60

- 1  
2  
3  
4  
5  
6  
7  
8  
9  
10  
11  
12  
13  
14  
15  
16  
17  
18  
19  
20  
21  
22  
23  
24  
25  
26  
27  
28  
29  
30  
31  
32  
33  
34  
35  
36  
37  
38  
39  
40  
41  
42  
43  
44  
45  
46  
47  
48  
49  
50  
51  
52  
53  
54  
55  
56  
57  
58  
59  
60
- JAMA* 2013;310(22):2395-96. doi: 10.1001/jama.2013.281078 pmid:241584282013-12-11].
5. G. Eysenbach. The law of attrition. *J MED INTERNET RES* 2005;7(1):e11. doi: 10.2196/jmir.7.1.e11 pmid:158294732005-03-31].
  6. M. J. Hutchesson, M. E. Rollo, R. Krukowski, et al. eHealth interventions for the prevention and treatment of overweight and obesity in adults: a systematic review with meta-analysis. *OBES REV* 2015;16(5):376-92. doi: 10.1111/obr.12268 pmid:25753009.[(c) 2015 World Obesity.:\*2015-05-01].
  7. B. Khokhar, J. Jones, P. E. Ronksley, et al. Effectiveness of mobile electronic devices in weight loss among overweight and obese populations: a systematic review and meta-analysis. *BMC Obes* 2014;1:22. doi: 10.1186/s40608-014-0022-4 pmid:262175092014-01-20].
  8. World Health Organization. mHealth: new horizons for health through mobile technologies: second global survey on eHealth (Global Observatory for eHealth Series, Volume 3). 2011. Accessed April 11, 2021. [https://apps.who.int/iris/bitstream/handle/10665/44607/9789241564250\\_eng.pdf?sequence=1&isAllowed=y](https://apps.who.int/iris/bitstream/handle/10665/44607/9789241564250_eng.pdf?sequence=1&isAllowed=y).
  9. G. Eysenbach. What is e-health? *J MED INTERNET RES* 2001;3(2):E20. doi: 10.2196/jmir.3.2.e20 pmid:117209622001-04-01].
  10. S. Goyal, J. A. Cafazzo. Mobile phone health apps for diabetes management: current evidence and future developments. *QJM* 2013;106(12):1067-69. doi: 10.1093/qjmed/hct203 pmid:241063132013-12-01].
  11. Gemma Flores Mateo, Esther Granado-Font, Carme Ferré-Grau, Xavier Montaña-Carreras. Mobile Phone Apps to Promote Weight Loss and Increase Physical Activity: A Systematic Review and Meta-Analysis. *J MED INTERNET RES* 2015;17(11):e253. doi: 10.2196/jmir.4836.[JMIR Publications Inc:\*2015-01-01].
  12. J. E. Orlikoff, M. K. Totten. Trustee workbook 3. E-health and the board: the brave new world of governance, Part 1. In. Trustee workbook 3. United States, 2000:4-14.
  13. Youfa Wang, Jungwon Min, Jacob Khuri, et al. Effectiveness of Mobile Health Interventions on Diabetes and Obesity Treatment and Management: Systematic Review of Systematic Reviews. *JMIR MHEALTH UHEALTH* 2020;8(4):e15400. doi: 10.2196/15400.[JMIR Publications:\*2020-01-01].
  14. L. S. Wieland, L. Falzon, C. N. Sciamanna, et al. Interactive computer - based interventions for weight loss or weight maintenance in overweight or obese people. *COCHRANE DB SYST REV* 2012(8) doi: 10.1002/14651858.CD007675.pub2.[ John Wiley & Sons, Ltd:\*2012-01-01].
  15. M. M. Islam, T. N. Poly, B. A. Walther, Y. C. Jack Li. Use of Mobile Phone App Interventions to Promote Weight Loss: Meta-Analysis. *JMIR MHEALTH UHEALTH* 2020;8(7):e17039. doi: 10.2196/170392020-01-01].
  16. Y. Lau, D. G. H. Chee, X. P. Chow, L. J. Cheng, S. N. Wong. Personalised eHealth interventions in adults with overweight and obesity: A systematic review and meta-analysis of randomised controlled trials. *PREV MED* 2020;132 doi: 10.1016/j.ypmed.2020.1060012020-01-01].
  17. M. J. Hutchesson, M. E. Rollo, R. Krukowski, et al. EHealth interventions for the prevention and treatment of overweight and obesity in adults: A systematic review with meta-analysis. *Diabetes Technology and Therapeutics* 2016;18:S67. doi: 10.1089/dia.2016.25062016-01-01].

# BMJ Open

## Effectiveness of mHealth/eHealth interventions on Obesity treatment: a protocol for umbrella review of meta-analyses

|                                 |                                                                                                                                                                                                                                                                                                                                                                                                                                                                                                                                                                                                                                                                                                                                                                                                                    |
|---------------------------------|--------------------------------------------------------------------------------------------------------------------------------------------------------------------------------------------------------------------------------------------------------------------------------------------------------------------------------------------------------------------------------------------------------------------------------------------------------------------------------------------------------------------------------------------------------------------------------------------------------------------------------------------------------------------------------------------------------------------------------------------------------------------------------------------------------------------|
| Journal:                        | <i>BMJ Open</i>                                                                                                                                                                                                                                                                                                                                                                                                                                                                                                                                                                                                                                                                                                                                                                                                    |
| Manuscript ID                   | bmjopen-2021-052443.R2                                                                                                                                                                                                                                                                                                                                                                                                                                                                                                                                                                                                                                                                                                                                                                                             |
| Article Type:                   | Protocol                                                                                                                                                                                                                                                                                                                                                                                                                                                                                                                                                                                                                                                                                                                                                                                                           |
| Date Submitted by the Author:   | 25-Feb-2022                                                                                                                                                                                                                                                                                                                                                                                                                                                                                                                                                                                                                                                                                                                                                                                                        |
| Complete List of Authors:       | Lei, Xiang-Guo; Guangxi Medical University First Affiliated Hospital, Geriatrics Department of Endocrinology and Metabolism; Guangxi Medical University First Affiliated Hospital, Guangxi Clinical Research Center for Cardiocerebrovascular Diseases<br>Huang, Zhongheng; Guangxi Medical University Rashi, Tamrakar; Guangxi Medical University First Affiliated Hospital, Geriatrics Department of Endocrinology and Metabolism; Guangxi Medical University First Affiliated Hospital, Guangxi Clinical Research Center for Cardiocerebrovascular Diseases<br>Yang, Xi; Guangxi Medical University First Affiliated Hospital, Geriatrics Department of Endocrinology and Metabolism; Guangxi Medical University First Affiliated Hospital, Guangxi Clinical Research Center for Cardiocerebrovascular Diseases |
| <b>Primary Subject Heading</b>: | Evidence based practice                                                                                                                                                                                                                                                                                                                                                                                                                                                                                                                                                                                                                                                                                                                                                                                            |
| Secondary Subject Heading:      | Evidence based practice                                                                                                                                                                                                                                                                                                                                                                                                                                                                                                                                                                                                                                                                                                                                                                                            |
| Keywords:                       | Telemedicine < BIOTECHNOLOGY & BIOINFORMATICS, World Wide Web technology < BIOTECHNOLOGY & BIOINFORMATICS, INTERNAL MEDICINE                                                                                                                                                                                                                                                                                                                                                                                                                                                                                                                                                                                                                                                                                       |
|                                 |                                                                                                                                                                                                                                                                                                                                                                                                                                                                                                                                                                                                                                                                                                                                                                                                                    |

SCHOLARONE™  
Manuscripts

Effectiveness of mHealth/eHealth interventions on obesity treatment: a protocol for umbrella review of meta-analyses

Xiang-Guo Lei<sup>123</sup>, Zhongheng Huang<sup>4</sup>, Tamrakar Rashi<sup>123</sup>, Xi Yang<sup>123</sup>

<sup>1</sup>Geriatrics Department of Endocrinology and Metabolism, The First Affiliated Hospital of Guangxi Medical University, Nanning, Guangxi, China.

<sup>2</sup>Guangxi Clinical Research Center for Cardiocerebrovascular Diseases, The First Affiliated Hospital of Guangxi Medical University, Nanning, Guangxi, China

<sup>3</sup>Guangxi Key Laboratory of Precision Medicine in Cardio cerebrovascular Diseases Control and Prevention, The First Affiliated Hospital of Guangxi Medical University, Nanning, Guangxi, China

<sup>4</sup>Guangxi Medical University

Correspondence to

Xi Yang;

yangxicc2008@sina.cn

## ABSTRACT

### Introduction

mHealth/eHealth have the effect of facilitate weight loss in overweight and obese populations. However, studies showed varied results and relatively high heterogeneity in the efficacy of mHealth/eHealth interventions. The aim of the paper is to systematically summarize published studies about the weight loss efficacy of mHealth/eHealth.

### Methods and analysis

A comprehensive review of PubMed, Embase and Cochrane Library databases published from inception until March 21, 2021 will be conducted. The selected articles are meta-analyses that integrated the studies, which evaluated efficacy of mHealth/eHealth. Two people will select eligible articles and extract data independently. Any disputes will be resolved by discussion or the arbitration of a third person. The methodological quality of the included meta-analyses will be assessed with AMSTAR 2 and the quality of evidence with GRADE. Study selection process will be presented using a flowchart. We will re-analyze each outcome with random effect methods. If possible, we will use funnel plot and Egger's test to evaluate if the publication bias existed.

### Ethics and dissemination

Ethical approval is not required for the study, as we only collected data from available published materials. This umbrella review will also be submitted to a peer-reviewed journal for publication after completion.

**PROSPERO registration number** CRD42021247006

### Strengths and limitations of this study

- ▶ We defined mHealth/eHealth as health practice or services supported by mobile phone, tablet and computer without using a text messaging reminder for a close physical proximity face-to-face service.
- ▶ This study differs from previous studies as it aims to reanalyze each outcome.
- ▶ A comprehensive search strategy will be used with a large number of databases searched.
- ▶ When sufficient data is available, we will do weight loss and weight loss subgroup analysis.
- ▶ The methodological quality of the included meta-analyses will be assessed with AMSTAR 2 and

1  
2  
3 the quality of evidence with GRADE.  
4  
5

## 6 **Introduction**

### 7 **Description of the condition**

8 Obesity is a chronic illness characterized by inordinate accumulation of body fat<sup>1</sup>. In 2005, 23.2%  
9 (937 million) of the global adult population was diagnosed as having overweight and 9.8% (396  
10 million) as having obesity; the respective numbers of adults with overweight and obesity are  
11 projected to be 1.35 billion and 573 million individuals in 2030, without adjusting for secular  
12 trends<sup>2</sup>. Obesity is responsible for about 5 percent of all deaths a year worldwide, and its global  
13 economic impact amounts to roughly \$2 trillion annually, or 2.8 percent of global GDP<sup>3</sup>. Research  
14 suggests that by delivering interventions via mHealth or eHealth, some of the cost problems of  
15 obesity interventions are mitigated<sup>4-6</sup> these two modalities have the potential to effectively  
16 facilitate weight loss in overweight and obese population<sup>6-7</sup>.  
17  
18  
19

### 20 **Description of the intervention**

21 The WHO proposes eHealth as a facilitator of health, and mHealth is a component of eHealth.  
22 mHealth/eHealth generally refers to the health services delivered or enhanced through  
23 mobile/electronic-related technology<sup>8-9</sup>. There's a lot of overlap between them, mHealth help  
24 patients improve their adherence to health care providers advice, enhance patient-provider  
25 communication, specifically mobile apps<sup>10-11</sup> and eHealth interventions combine the use of  
26 emerging communication technologies, such as the Internet and Smartphones, to facilitate  
27 behavior changes and improvements in health<sup>12</sup>. To date, mHealth/eHealth have no standard  
28 definition. In this study, we defined mHealth/eHealth as health practice or services supported by  
29 mobile phone, tablet and computer without using a text messaging reminder for a close physical  
30 proximity face-to-face service. One previous review of reviews has described the development of  
31 mHealth and its utility for patients with obesity<sup>13</sup>. Nonetheless, their scope did not adequately  
32 address the effectiveness of eHealth for obesity treatment and without analyzing the findings  
33 from the original studies. At present, there are many meta-analyses about mHealth/eHealth<sup>14-17</sup>  
34 and we are looking specifically at weight reduction between behavior change. Therefore this  
35 umbrella review evaluated the effectiveness of mHealth/eHealth interventions and weighed the  
36 strength and validity of mHealth/eHealth interventions in the literature.  
37  
38  
39  
40  
41  
42  
43

### 44 **Aim**

45 This study aims at conduct an umbrella review of meta-analyses regarding the associations  
46 between mHealth/eHealth interventions and obesity treatment, and reanalyze its strength and  
47 validity.  
48  
49

### 50 **Methods**

#### 51 **Stage 1: identifying relevant studies**

52 At this stage, authors will establish a team and discuss the eligibility criteria, electronic databases  
53 and search strategy.  
54  
55

#### 56 **Eligibility criteria**

57 Meta-analyses of observational studies or meta-analyses of randomized controlled trials and  
58 follow-up duration at least 4 weeks.  
59  
60

1  
2  
3 Original studies and studies with no summary relative risks (e.g. systematic reviews), studies  
4 reported in languages other than English will be excluded.  
5  
6

### 7 **Databases**

8 The identification of studies relevant to this overview will be gained by searching the published  
9 reviews from inception of databases until March 21, 2021 which are listed below: PubMed,  
10 Embase and Cochrane Library. We will also manually search all reference lists of the included  
11 studies to identify additional reviews of relevance.  
12  
13  
14

### 15 **Search strategy**

16 We will use the search strategy with these specified keywords: (Overweight OR Obesity OR  
17 weight gain OR weight loss OR body mass index OR skinfold thickness OR waist-hip ratio OR  
18 Abdominal Fat) AND (mhealth OR ehealth OR telemedicine OR digital health OR telehealth OR  
19 virtual medicine) AND (Metaanalysis OR Meta OR meta-analys\* OR systematic review). We will  
20 modify the search strategy to suit PubMed, Embase and Cochrane Library databases.  
21  
22  
23

### 24 **Stage 2: study selection**

25 We will import our search results into software and then start selection. The review process  
26 consists of two levels of screening: (1) a title and abstract review and (2) a full-text review. In the  
27 first phase of screening, the titles and abstracts of the retrieved articles will be browsed through  
28 and analyzed by two independent investigators to identify potential eligibility. In the second  
29 phase, the two investigators will then independently evaluate the full-text articles to decide  
30 whether each should be included/excluded. Any discrepancies in the two phases will be  
31 reconsidered, and unresolved disagreements will be further discussed with a third investigator,  
32 until a full consensus is reached.  
33  
34  
35  
36

### 37 **Stage 3: data extraction**

38 Data extraction tables will be established in Excel and the data from selected articles will be  
39 extracted independently by two people. Disputes will be resolved by discussion or the arbitration  
40 of a third person if necessary.  
41 The following categories of data will be extracted: the first author, year of publication, number of  
42 trials included, sample size, Intervention, Control, quality assessment, main conclusion.  
43  
44  
45  
46

### 47 **Population**

48 Adult population with overweight or obesity

49 We will define overweight as a body mass index (BMI) : 25 kg/m-squared and < 30 kg/m-squared  
50 (AAFP2013; WHO 2004). Obesity will be defined by a BMI : 30 kg/m-squared (AAFP 2013; WHO  
51 2004)  
52  
53

### 54 **Intervention**

55 mHealth/eHealth as health practice or services supported by mobile phone, tablet or computer  
56  
57

### 58 **Comparators**

59 Use other methods other than mHealth/eHealth or orthobiosis  
60

## Type of studies

Meta analyses

## Outcomes

### Primary outcomes

Weight loss and weight loss subgroup analysis (mobile phone base weight loss group, computer base weight loss group, tablet base weight loss group, mobile phone + computer base weight loss group, mobile phone + tablet base weight loss group, computer + tablet base weight loss group)

### Secondary outcomes

BMI change, Waist change

### Stage 4: data synthesis and statistical analysis

Statistical analysis will be conducted with RevMan V.5.4 software provided by Cochrane Collaboration and Stata software (version 12; StataCorp LP, College Station, Texas). In our analysis, when possible, we will stratify the comparisons into several groups, such as group of use other methods other than mHealth/eHealth and orthobiosis group. We will do subgroup analysis according to the forms of intervention, such as mobile app group, text message group, website group.

A qualitative and quantitative analysis will be provided. The quantitative analysis will be performed through calculation of weighted mean differences for continuous outcomes and risk ratio for the dichotomous.

Heterogeneity will be evaluated using the  $I^2$  statistic. We will use 25%, 50% and 75% as cut-offs for low, moderate and high heterogeneity, respectively.

### Stage 5: identifying possible publication bias

Small study effects and publication bias will be assessed by using graphical and statistical tests, namely the funnel plot and Egger's test. A p-value of <0.10 indicates the presence of publication bias.

### Stage 6: evaluating quality of included studies

We will assess both the methodological quality and the quality of evidence of each including meta-analysis using validated tools. The methodological quality of the included meta-analyses will be assessed with AMSTAR 2 and the quality of evidence with GRADE.

## Patient and public involvement

No patients are involved in developing plans for project and implementation of this study. None of them are asked to advise on interpretation of results. The results will be disseminated to the general population through public presentations by the authors.

## Discussion

In meta-analyses that focused on outcomes of mHealth/eHealth interventions, some of the

1  
2  
3 results are widely divergent. When sufficient data are available, we will stratify our comparisons  
4 and do subgroup analysis.

5  
6 The limitations of our study are the heterogeneity and quality of the selected reviews. To address  
7 the limitations, we will reanalyze each outcome using the random effects model. We will also use  
8 AMSTAR 2 and GRADE to evaluate the quality of studies that we will include. These factors will  
9 be carefully considered when interpreting the results. Furthermore, we will discuss  
10 non-mHealth/eHealth interventions on Obesity treatment, including drug intervention and  
11 surgical intervention.  
12  
13

#### 14 **Ethics and dissemination**

15  
16 Ethical approval is not required for the study, as we only collected data from available materials.  
17 This umbrella review will also be submitted to a peer-reviewed journal for publication.  
18  
19

20 **Contributors** XY carried on the conception and construction of this protocol. X-GL developed the  
21 search strategy. X-GL and ZH found the tools for evaluating quality of included reviews. X-GL  
22 wrote the protocol. TR reviewed and amended draft of the protocol. X-GL and TR added  
23 grammar editing and conceptual clarification. All authors read and approved the final  
24 manuscript.  
25

26 **Funding** This work was supported by Medical and Health Appropriate Technology Development,  
27 Promotion and Application Project of Guangxi [Grant numbers 2016018] and The Excellent  
28 Medical Elite Training Program of The First Affiliated Hospital of Guangxi Medical University  
29 [Grant numbers 2017025].  
30  
31

32 **Competing interests** None declared.

33 **Patient consent for publication** Not required.

34 **Provenance and peer review** Not commissioned; externally peer reviewed.

35  
36 **Open access** This is an open access article distributed in accordance with the Creative Commons  
37 Attribution Non Commercial (CC BY-NC 4.0) license, which permits others to distribute, remix,  
38 adapt, build upon this work non-commercially, and license their derivative works on different  
39 terms, provided the original work is properly cited, appropriate credit is given, any changes made  
40 indicated, and the use is non-commercial.  
41

42 See: <http://creativecommons.org/licenses/by-nc/4.0/>.

#### 43 **ORCID iD**

44  
45 Xiang-Guo Lei <https://orcid.org/0000-0002-0094-7910>  
46  
47  
48  
49

## 50 **References**

- 51  
52  
53 1. D. W. Haslam, W. P. James. Obesity. *LANCET* 2005;366(9492):1197-209. doi:  
54 10.1016/S0140-6736(05)67483-1 pmid:161987692005-10-01].  
55  
56 2. T. Kelly, W. Yang, C. S. Chen, K. Reynolds, J. He. Global burden of obesity in 2005 and  
57 projections to 2030. *Int J Obes (Lond)* 2008;32(9):1431-37. doi: 10.1038/ijo.2008.102  
58 pmid:186073832008-09-01].  
59  
60 3. Dobbs R, Sawers C, Thompson F, et al. How the world could better fight obesity. November 1,

2014. Accessed April 11, 2021. <https://www.mckinsey.com/industries/healthcare-systems-and-services/our-insights/how-the-world-could-better-fight-obesity>.
4. S. R. Steinhubl, E. D. Muse, E. J. Topol. Can mobile health technologies transform health care? *JAMA* 2013;310(22):2395-96. doi: 10.1001/jama.2013.281078 pmid:241584282013-12-11].
  5. G. Eysenbach. The law of attrition. *J MED INTERNET RES* 2005;7(1):e11. doi: 10.2196/jmir.7.1.e11 pmid:158294732005-03-31].
  6. M. J. Hutchesson, M. E. Rollo, R. Krukowski, et al. eHealth interventions for the prevention and treatment of overweight and obesity in adults: a systematic review with meta-analysis. *OBES REV* 2015;16(5):376-92. doi: 10.1111/obr.12268 pmid:25753009.[(c) 2015 World Obesity.:\*2015-05-01].
  7. B. Khokhar, J. Jones, P. E. Ronksley, et al. Effectiveness of mobile electronic devices in weight loss among overweight and obese populations: a systematic review and meta-analysis. *BMC Obes* 2014;1:22. doi: 10.1186/s40608-014-0022-4 pmid:262175092014-01-20].
  8. World Health Organization. mHealth: new horizons for health through mobile technologies: second global survey on eHealth (Global Observatory for eHealth Series, Volume 3). 2011. Accessed April 11, 2021. [https://apps.who.int/iris/bitstream/handle/10665/44607/9789241564250\\_eng.pdf?sequence=1&isAllowed=y](https://apps.who.int/iris/bitstream/handle/10665/44607/9789241564250_eng.pdf?sequence=1&isAllowed=y).
  9. G. Eysenbach. What is e-health? *J MED INTERNET RES* 2001;3(2):E20. doi: 10.2196/jmir.3.2.e20 pmid:117209622001-04-01].
  10. S. Goyal, J. A. Cafazzo. Mobile phone health apps for diabetes management: current evidence and future developments. *QJM* 2013;106(12):1067-69. doi: 10.1093/qjmed/hct203 pmid:241063132013-12-01].
  11. Gemma Flores Mateo, Esther Granado-Font, Carme Ferré-Grau, Xavier Montaña-Carreras. Mobile Phone Apps to Promote Weight Loss and Increase Physical Activity: A Systematic Review and Meta-Analysis. *J MED INTERNET RES* 2015;17(11):e253. doi: 10.2196/jmir.4836.[JMIR Publications Inc:\*2015-01-01].
  12. J. E. Orlikoff, M. K. Totten. Trustee workbook 3. E-health and the board: the brave new world of governance, Part 1. In. Trustee workbook 3. United States, 2000:4-14.
  13. Youfa Wang, Jungwon Min, Jacob Khuri, et al. Effectiveness of Mobile Health Interventions on Diabetes and Obesity Treatment and Management: Systematic Review of Systematic Reviews. *JMIR MHEALTH UHEALTH* 2020;8(4):e15400. doi: 10.2196/15400.[JMIR Publications:\*2020-01-01].
  14. L. S. Wieland, L. Falzon, C. N. Sciamanna, et al. Interactive computer - based interventions for weight loss or weight maintenance in overweight or obese people. *COCHRANE DB SYST REV* 2012(8) doi: 10.1002/14651858.CD007675.pub2.[ John Wiley & Sons, Ltd:\*2012-01-01].
  15. M. M. Islam, T. N. Poly, B. A. Walther, Y. C. Jack Li. Use of Mobile Phone App Interventions to Promote Weight Loss: Meta-Analysis. *JMIR MHEALTH UHEALTH* 2020;8(7):e17039. doi: 10.2196/170392020-01-01].
  16. Y. Lau, D. G. H. Chee, X. P. Chow, L. J. Cheng, S. N. Wong. Personalised eHealth interventions in adults with overweight and obesity: A systematic review and meta-analysis of randomised controlled trials. *PREV MED* 2020;132 doi: 10.1016/j.ypmed.2020.1060012020-01-01].
  17. M. J. Hutchesson, M. E. Rollo, R. Krukowski, et al. EHealth interventions for the prevention and

1  
2  
3  
4  
5  
6  
7  
8  
9  
10  
11  
12  
13  
14  
15  
16  
17  
18  
19  
20  
21  
22  
23  
24  
25  
26  
27  
28  
29  
30  
31  
32  
33  
34  
35  
36  
37  
38  
39  
40  
41  
42  
43  
44  
45  
46  
47  
48  
49  
50  
51  
52  
53  
54  
55  
56  
57  
58  
59  
60

treatment of overweight and obesity in adults: A systematic review with meta-analysis. *Diabetes Technology and Therapeutics* 2016;18:S67. doi: 10.1089/dia.2016.25062016-01-01].

For peer review only

# BMJ Open

## Effectiveness of mHealth/eHealth interventions on Obesity treatment: a protocol for umbrella review of meta-analyses

|                                 |                                                                                                                                                                                                                                                                                                                                                                                                                                                                                                                                                                                                                                                                                                                                                                                                                    |
|---------------------------------|--------------------------------------------------------------------------------------------------------------------------------------------------------------------------------------------------------------------------------------------------------------------------------------------------------------------------------------------------------------------------------------------------------------------------------------------------------------------------------------------------------------------------------------------------------------------------------------------------------------------------------------------------------------------------------------------------------------------------------------------------------------------------------------------------------------------|
| Journal:                        | <i>BMJ Open</i>                                                                                                                                                                                                                                                                                                                                                                                                                                                                                                                                                                                                                                                                                                                                                                                                    |
| Manuscript ID                   | bmjopen-2021-052443.R3                                                                                                                                                                                                                                                                                                                                                                                                                                                                                                                                                                                                                                                                                                                                                                                             |
| Article Type:                   | Protocol                                                                                                                                                                                                                                                                                                                                                                                                                                                                                                                                                                                                                                                                                                                                                                                                           |
| Date Submitted by the Author:   | 07-Mar-2022                                                                                                                                                                                                                                                                                                                                                                                                                                                                                                                                                                                                                                                                                                                                                                                                        |
| Complete List of Authors:       | Lei, Xiang-Guo; Guangxi Medical University First Affiliated Hospital, Geriatrics Department of Endocrinology and Metabolism; Guangxi Medical University First Affiliated Hospital, Guangxi Clinical Research Center for Cardiocerebrovascular Diseases<br>Huang, Zhongheng; Guangxi Medical University Rashi, Tamrakar; Guangxi Medical University First Affiliated Hospital, Geriatrics Department of Endocrinology and Metabolism; Guangxi Medical University First Affiliated Hospital, Guangxi Clinical Research Center for Cardiocerebrovascular Diseases<br>Yang, Xi; Guangxi Medical University First Affiliated Hospital, Geriatrics Department of Endocrinology and Metabolism; Guangxi Medical University First Affiliated Hospital, Guangxi Clinical Research Center for Cardiocerebrovascular Diseases |
| <b>Primary Subject Heading</b>: | Evidence based practice                                                                                                                                                                                                                                                                                                                                                                                                                                                                                                                                                                                                                                                                                                                                                                                            |
| Secondary Subject Heading:      | Evidence based practice                                                                                                                                                                                                                                                                                                                                                                                                                                                                                                                                                                                                                                                                                                                                                                                            |
| Keywords:                       | Telemedicine < BIOTECHNOLOGY & BIOINFORMATICS, World Wide Web technology < BIOTECHNOLOGY & BIOINFORMATICS, INTERNAL MEDICINE                                                                                                                                                                                                                                                                                                                                                                                                                                                                                                                                                                                                                                                                                       |
|                                 |                                                                                                                                                                                                                                                                                                                                                                                                                                                                                                                                                                                                                                                                                                                                                                                                                    |

SCHOLARONE™  
Manuscripts

Effectiveness of mHealth/eHealth interventions on obesity treatment: a protocol for umbrella review of meta-analyses

Xiang-Guo Lei<sup>123</sup>, Zhongheng Huang<sup>4</sup>, Rashi Tamrakar<sup>123</sup>, Xi Yang<sup>123</sup>

<sup>1</sup>Geriatrics Department of Endocrinology and Metabolism, The First Affiliated Hospital of Guangxi Medical University, Nanning, Guangxi, China.

<sup>2</sup>Guangxi Clinical Research Center for Cardiocerebrovascular Diseases, The First Affiliated Hospital of Guangxi Medical University, Nanning, Guangxi, China

<sup>3</sup>Guangxi Key Laboratory of Precision Medicine in Cardio cerebrovascular Diseases Control and Prevention, The First Affiliated Hospital of Guangxi Medical University, Nanning, Guangxi, China

<sup>4</sup>Guangxi Medical University

Correspondence to

Xi Yang;

yangxicc2008@sina.cn

## ABSTRACT

### Introduction

mHealth/eHealth have the effect of facilitating weight loss in overweight and obese populations. However, studies have shown varied results and relatively high heterogeneity in the efficacy of mHealth/eHealth interventions. The aim of the paper is to systematically summarize published studies about the weight loss efficacy of mHealth/eHealth.

### Methods and analysis

A comprehensive review of PubMed, Embase and Cochrane Library databases published from inception until March 21, 2021 will be conducted. The selected articles are meta-analyses that integrated the studies, which evaluated efficacy of mHealth/eHealth. Two people will select eligible articles and extract data independently. Any disputes will be resolved by discussion or the arbitration of a third person. The methodological quality of the included meta-analyses will be assessed with AMSTAR 2 and the quality of evidence with GRADE. Study selection process will be presented using a flowchart. We will re-analyze each outcome with random effect methods. If possible, we will use funnel plot and Egger's test to evaluate if the publication bias existed.

### Ethics and dissemination

Ethical approval is not required for the study, as we only collected data from available published materials. This umbrella review will also be submitted to a peer-reviewed journal for publication after completion.

**PROSPERO registration number** CRD42021247006

### Strengths and limitations of this study

- ▶ This study differs from previous studies as it aims to reanalyze each outcome.
- ▶ A comprehensive search strategy will be used with a large number of databases searched.
- ▶ The methodological quality of the included meta-analyses will be assessed with AMSTAR 2 and the quality of evidence with GRADE.
- ▶ Mobile health/e-health interventions for obesity treatment include multiple modalities, so we may not include all interventions in an umbrella review.
- ▶ Studies related to rare intervention methods might not be included in systematic reviews, and

1  
2  
3 thus would not be represented in this umbrella review, a main limitation of our work.

## 4 **Introduction**

### 5 **Description of the condition**

6 Obesity is a chronic illness characterized by inordinate accumulation of body fat<sup>1</sup>. In 2005, 23.2%  
7 (937 million) of the global adult population was diagnosed as having overweight and 9.8% (396  
8 million) as having obesity; the respective numbers of adults with overweight and obesity are  
9 projected to be 1.35 billion and 573 million individuals in 2030, without adjusting for secular  
10 trends<sup>2</sup>. Obesity is responsible for about 5 percent of all deaths a year worldwide, and its global  
11 economic impact amounts to roughly \$2 trillion annually, or 2.8 percent of global GDP<sup>3</sup>. Research  
12 suggests that by delivering interventions via mHealth or eHealth, some of the cost problems of  
13 obesity interventions are mitigated<sup>4-6</sup>. These two modalities have the potential to effectively  
14 facilitate weight loss in overweight and obese population<sup>6-7</sup>.

### 15 **Description of the intervention**

16 The WHO proposes eHealth as a facilitator of health, and mHealth is a component of eHealth.  
17 mHealth/eHealth generally refers to the health services delivered or enhanced through  
18 mobile/electronic-related technology<sup>8-9</sup>. There's a lot of overlap between them, mHealth helps  
19 patients improve their adherence to health care providers advice, enhance patient-provider  
20 communication, specifically mobile apps<sup>10-11</sup> and eHealth interventions combine the use of  
21 emerging communication technologies, such as the Internet and Smartphones, to facilitate  
22 behavior changes and improvements in health<sup>12</sup>. To date, mHealth/eHealth have no standard  
23 definition. In this study, we defined mHealth/eHealth as health practices or services supported  
24 by mobile phones, tablets and computers without using a text message reminder for a  
25 close-physical proximity face-to-face service. One previous review of reviews has described the  
26 development of mHealth and its utility for patients with obesity<sup>13</sup>. Nonetheless, their scope  
27 neither adequately addressed the effectiveness of eHealth for obesity treatment nor analyzed  
28 the findings from the original studies. At present, there are many meta-analyses about  
29 mHealth/eHealth<sup>14-17</sup> and we are specifically looking at weight reduction and behavior change.  
30 Therefore this umbrella review evaluated the effectiveness of mHealth/eHealth interventions  
31 and weighed the strength and validity of mHealth/eHealth interventions in the literature.

### 32 **Aim**

33 This study aims to conduct an umbrella review of meta-analyses regarding the associations  
34 between mHealth/eHealth interventions and obesity treatment, and reanalyze its strength and  
35 validity.

### 36 **Methods**

#### 37 **Stage 1: Identifying relevant studies**

38 At this stage, authors will establish a team and discuss the eligibility criteria, electronic databases  
39 and search strategy.

#### 40 **Eligibility criteria**

41 Meta-analyses of observational studies or meta-analyses of randomized controlled trials and  
42 follow-up duration of at least 4 weeks.

43 Original studies and studies with no summary of relative risks (e.g. systematic reviews), studies  
44  
45  
46  
47  
48  
49  
50  
51  
52  
53  
54  
55  
56  
57  
58  
59  
60

1  
2  
3 reported in languages other than English will be excluded.  
4  
5

### 6 **Databases**

7 The identification of studies relevant to this overview will be obtained by searching the published  
8 reviews from inception of databases until March 21, 2021 which are listed below: PubMed,  
9 Embase and Cochrane Library. We will also manually search all reference lists of the included  
10 studies to identify additional reviews of relevance.  
11  
12

### 13 **Search strategy**

14 We will use the search strategy with these specified keywords: (Overweight OR Obesity OR  
15 weight gain OR weight loss OR body mass index OR skinfold thickness OR waist-hip ratio OR  
16 Abdominal Fat) AND (mhealth OR ehealth OR telemedicine OR digital health OR telehealth OR  
17 virtual medicine) AND (Metaanalysis OR Meta OR meta-analys\* OR systematic review). We will  
18 modify the search strategy to suit PubMed, Embase and Cochrane Library databases.  
19  
20  
21  
22

### 23 **Stage 2: Study selection**

24 We will import our search results into software and then start selection. The review process  
25 consists of two levels of screening: (1) a title and abstract review and (2) a full-text review. In the  
26 first phase of screening, the titles and abstracts of the retrieved articles will be browsed through  
27 and analyzed by two independent investigators to identify potential eligibility. In the second  
28 phase, the two investigators will then independently evaluate the full-text articles to decide  
29 whether each should be included/excluded. Any discrepancies in the two phases will be  
30 reconsidered, and unresolved disagreements will be further discussed with a third investigator,  
31 until a full consensus is reached.  
32  
33  
34  
35

### 36 **Stage 3: Data extraction**

37 Data extraction tables will be established in Excel and the data from selected articles will be  
38 extracted independently by two people. Disputes will be resolved by discussion or the arbitration  
39 of a third person if necessary.  
40 The following categories of data will be extracted: the first author, year of publication, number of  
41 trials included, sample size, Intervention, Control, quality assessment, main conclusion.  
42  
43  
44

### 45 **Population**

46 Adult population with overweight or obesity

47 We will define overweight as a body mass index (BMI) : 25 kg/m<sup>2</sup> and < 30 kg/m<sup>2</sup> (AAFP2013;  
48 WHO 2004). Obesity will be defined by a BMI : 30 kg/m<sup>2</sup> (AAFP 2013; WHO 2004)  
49  
50

### 51 **Intervention**

52 mHealth/eHealth as health practices or services supported by mobile phones, tablets or  
53 computers  
54  
55

### 56 **Comparators**

57 Use other methods other than mHealth/eHealth or orthobiosis  
58  
59  
60

**Type of studies**

Meta analyses

**Outcomes****Primary outcomes**

Weight loss and weight loss subgroup analysis (mobile phone base weight loss group, computer base weight loss group, tablet base weight loss group, mobile phone + computer base weight loss group, mobile phone + tablet base weight loss group, computer + tablet base weight loss group)

**Secondary outcomes**

BMI change, Waist change

**Stage 4: Data synthesis and statistical analysis**

Statistical analysis will be conducted with RevMan V.5.4 software provided by Cochrane Collaboration and Stata software (version 12; StataCorp LP, College Station, Texas). In our analysis, when possible, we will stratify the comparisons into several groups, such as group that uses other methods other than mHealth/eHealth and orthobiosis group. We will do subgroup analysis according to the forms of intervention, such as mobile app group, text message group, website group.

A qualitative and quantitative analysis will be provided. The quantitative analysis will be performed through calculation of weighted mean differences for continuous outcomes and risk ratio for the dichotomous.

Heterogeneity will be evaluated using the  $I^2$  statistic. We will use 25%, 50% and 75% as cut-offs for low, moderate and high heterogeneity, respectively.

**Stage 5: Identifying possible publication bias**

Small study effects and publication bias will be assessed by using graphical and statistical tests, namely the funnel plot and Egger's test. A p-value of <0.10 indicates the presence of publication bias.

**Stage 6: Evaluating quality of included studies**

We will assess both the methodological quality and the quality of evidence for each, including meta-analysis using validated tools. The methodological quality of the included meta-analyses will be assessed with AMSTAR 2 and the quality of evidence with GRADE.

**Patient and public involvement**

No patients are involved in developing plans for project and implementation of this study. None of them are asked to advise on interpretation of results. The results will be disseminated to the general population through public presentations by the authors.

**Discussion**

In meta-analyses that focused on outcomes of mHealth/eHealth interventions, some of the results are widely divergent. When sufficient data are available, we will stratify our comparisons

1  
2  
3 and do subgroup analysis.

4 The limitations of our study are the heterogeneity and quality of the selected reviews. To address  
5 the limitations, we will reanalyze each outcome using the random effects model. We will also use  
6 AMSTAR 2 and GRADE to evaluate the quality of studies that we will include. These factors will  
7 be carefully considered while interpreting the results. Furthermore, we will discuss  
8 non-mHealth/eHealth interventions on Obesity treatment, including drug intervention and  
9 surgical intervention.  
10  
11  
12

### 13 **Ethics and dissemination**

14 Ethical approval is not required for the study, as we only collected data from available materials.  
15 This umbrella review will also be submitted to a peer-reviewed journal for the publication.  
16  
17

18  
19 **Contributors** XY carried on the conception and construction of this protocol. X-GL developed the  
20 search strategy. X-GL and ZH found the tools for evaluating quality of included reviews. X-GL  
21 wrote the protocol. RT reviewed and amended the draft of the protocol. X-GL and RT added  
22 grammar editing and conceptual clarification. All authors have read and approved the final  
23 manuscript.  
24

25 **Funding** This work was supported by Medical and Health Appropriate Technology Development,  
26 Promotion and Application Project of Guangxi [Grant numbers 2016018] and The Excellent  
27 Medical Elite Training Program of The First Affiliated Hospital of Guangxi Medical University  
28 [Grant numbers 2017025].  
29

30 **Competing interests** None declared.  
31

32 **Patient consent for publication** Not required.  
33

34 **Provenance and peer review** Not commissioned; externally peer reviewed.  
35

36 **Open access** This is an open access article distributed in accordance with the Creative Commons  
37 Attribution Non Commercial (CC BY-NC 4.0) license, which permits others to distribute, remix,  
38 adapt, build upon this work non-commercially, and license their derivative works on different  
39 terms, provided the original work is properly cited, appropriate credit is given, any changes made  
40 indicated, and the use is non-commercial.

41 See: <http://creativecommons.org/licenses/by-nc/4.0/>.  
42

### 43 **ORCID iD**

44 Xiang-Guo Lei <https://orcid.org/0000-0002-0094-7910>  
45  
46  
47

## 48 **References**

- 49  
50 1. D. W. Haslam, W. P. James. Obesity. *LANCET* 2005;366(9492):1197-209. doi:  
51 10.1016/S0140-6736(05)67483-1 pmid:161987692005-10-01].  
52  
53 2. T. Kelly, W. Yang, C. S. Chen, K. Reynolds, J. He. Global burden of obesity in 2005 and  
54 projections to 2030. *Int J Obes (Lond)* 2008;32(9):1431-37. doi: 10.1038/ijo.2008.102  
55 pmid:186073832008-09-01].  
56  
57 3. Dobbs R, Sawers C, Thompson F, et al. How the world could better fight obesity. November 1,  
58 2014. Accessed April 11, 2021.  
59 <https://www.mckinsey.com/industries/healthcare-systems-and-services/our-insights/how-the-world>  
60

- d-could-better-fight-obesity.
4. S. R. Steinhubl, E. D. Muse, E. J. Topol. Can mobile health technologies transform health care? *JAMA* 2013;310(22):2395-96. doi: 10.1001/jama.2013.281078 pmid:241584282013-12-11].
  5. G. Eysenbach. The law of attrition. *J MED INTERNET RES* 2005;7(1):e11. doi: 10.2196/jmir.7.1.e11 pmid:158294732005-03-31].
  6. M. J. Hutchesson, M. E. Rollo, R. Krukowski, et al. eHealth interventions for the prevention and treatment of overweight and obesity in adults: a systematic review with meta-analysis. *OBES REV* 2015;16(5):376-92. doi: 10.1111/obr.12268 pmid:25753009.[(c) 2015 World Obesity.:\*2015-05-01].
  7. B. Khokhar, J. Jones, P. E. Ronksley, et al. Effectiveness of mobile electronic devices in weight loss among overweight and obese populations: a systematic review and meta-analysis. *BMC Obes* 2014;1:22. doi: 10.1186/s40608-014-0022-4 pmid:262175092014-01-20].
  8. World Health Organization. mHealth: new horizons for health through mobile technologies: second global survey on eHealth (Global Observatory for eHealth Series, Volume 3). 2011. Accessed April 11, 2021. [https://apps.who.int/iris/bitstream/handle/10665/44607/9789241564250\\_eng.pdf?sequence=1&isAllowed=y](https://apps.who.int/iris/bitstream/handle/10665/44607/9789241564250_eng.pdf?sequence=1&isAllowed=y).
  9. G. Eysenbach. What is e-health? *J MED INTERNET RES* 2001;3(2):E20. doi: 10.2196/jmir.3.2.e20 pmid:117209622001-04-01].
  10. S. Goyal, J. A. Cafazzo. Mobile phone health apps for diabetes management: current evidence and future developments. *QJM* 2013;106(12):1067-69. doi: 10.1093/qjmed/hct203 pmid:241063132013-12-01].
  11. Gemma Flores Mateo, Esther Granado-Font, Carme Ferré-Grau, Xavier Montaña-Carreras. Mobile Phone Apps to Promote Weight Loss and Increase Physical Activity: A Systematic Review and Meta-Analysis. *J MED INTERNET RES* 2015;17(11):e253. doi: 10.2196/jmir.4836.[JMIR Publications Inc:\*2015-01-01].
  12. J. E. Orlikoff, M. K. Totten. Trustee workbook 3. E-health and the board: the brave new world of governance, Part 1. In. Trustee workbook 3. United States, 2000:4-14.
  13. Youfa Wang, Jungwon Min, Jacob Khuri, et al. Effectiveness of Mobile Health Interventions on Diabetes and Obesity Treatment and Management: Systematic Review of Systematic Reviews. *JMIR MHEALTH UHEALTH* 2020;8(4):e15400. doi: 10.2196/15400.[JMIR Publications:\*2020-01-01].
  14. L. S. Wieland, L. Falzon, C. N. Sciamanna, et al. Interactive computer - based interventions for weight loss or weight maintenance in overweight or obese people. *COCHRANE DB SYST REV* 2012(8) doi: 10.1002/14651858.CD007675.pub2.[ John Wiley & Sons, Ltd:\*2012-01-01].
  15. M. M. Islam, T. N. Poly, B. A. Walther, Y. C. Jack Li. Use of Mobile Phone App Interventions to Promote Weight Loss: Meta-Analysis. *JMIR MHEALTH UHEALTH* 2020;8(7):e17039. doi: 10.2196/170392020-01-01].
  16. Y. Lau, D. G. H. Chee, X. P. Chow, L. J. Cheng, S. N. Wong. Personalised eHealth interventions in adults with overweight and obesity: A systematic review and meta-analysis of randomised controlled trials. *PREV MED* 2020;132 doi: 10.1016/j.ypmed.2020.1060012020-01-01].
  17. M. J. Hutchesson, M. E. Rollo, R. Krukowski, et al. EHealth interventions for the prevention and treatment of overweight and obesity in adults: A systematic review with meta-analysis. *Diabetes Technology and Therapeutics* 2016;18:S67. doi: 10.1089/dia.2016.25062016-01-01].
